# Supplementary material for: Association between lncRNA GAS5, MEG3, and PCAT-1 Polymorphisms and Cancer Risk: A Meta-Analysis
Source: Hindawi journal article supplement (doi:10.1155/2020/6723487), 2020-03-28
Supplement: f1 [file 6723487.f1.docx]

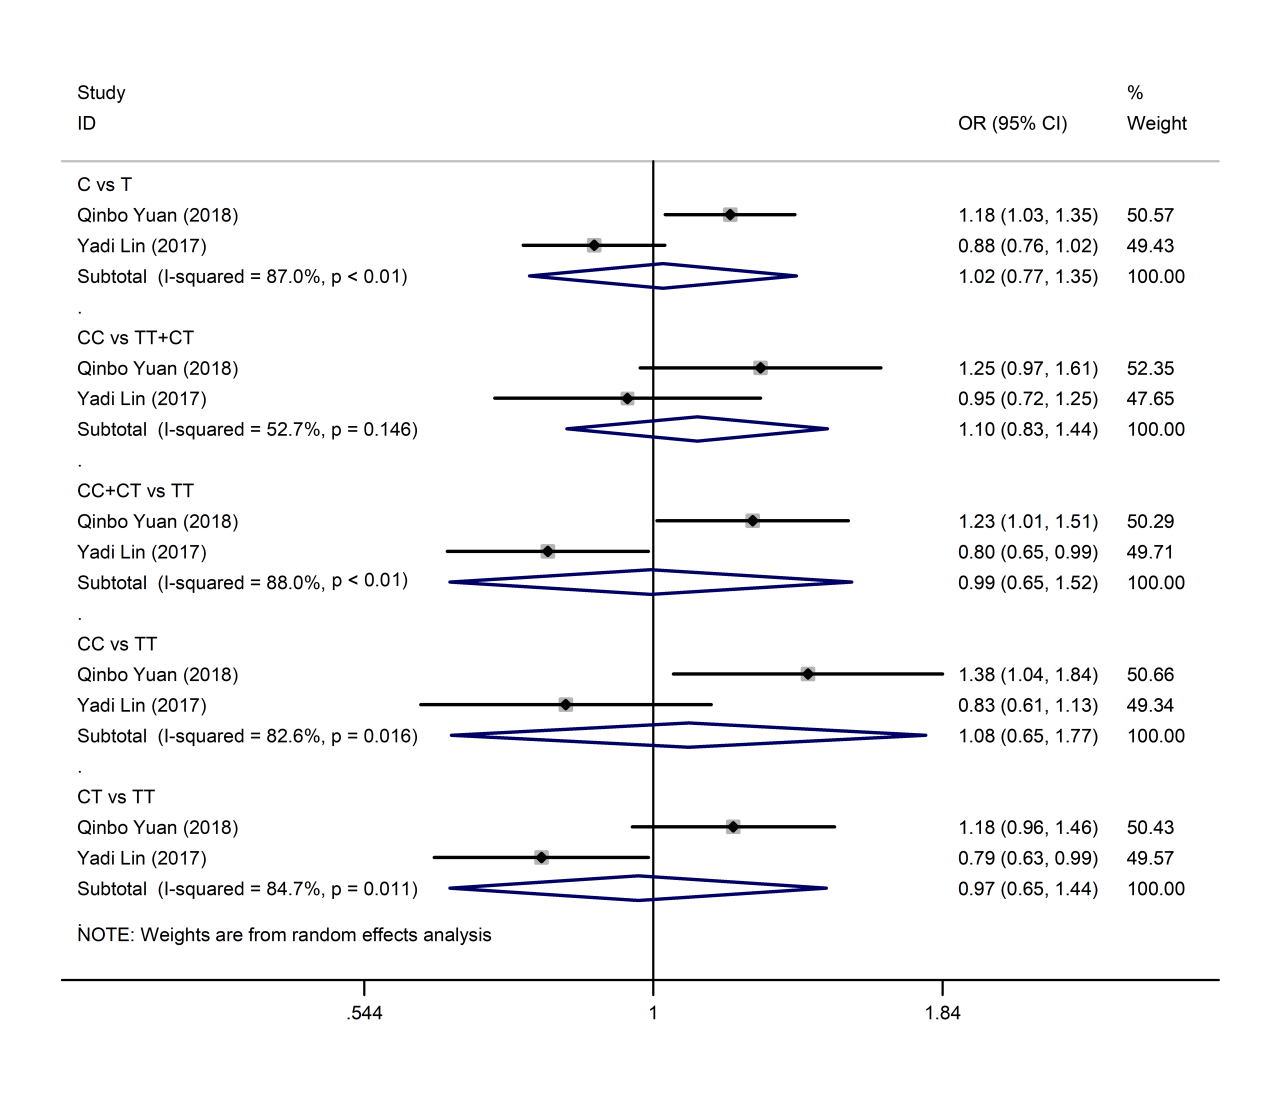


Supplementary figure 1. **The forest plot of the association between PCAT1 at rs1902432 and cancer risk in five genetic models.** OR: odds ratios, 95% CI: 95% confidence intervals. Weights are from random effects analysis.


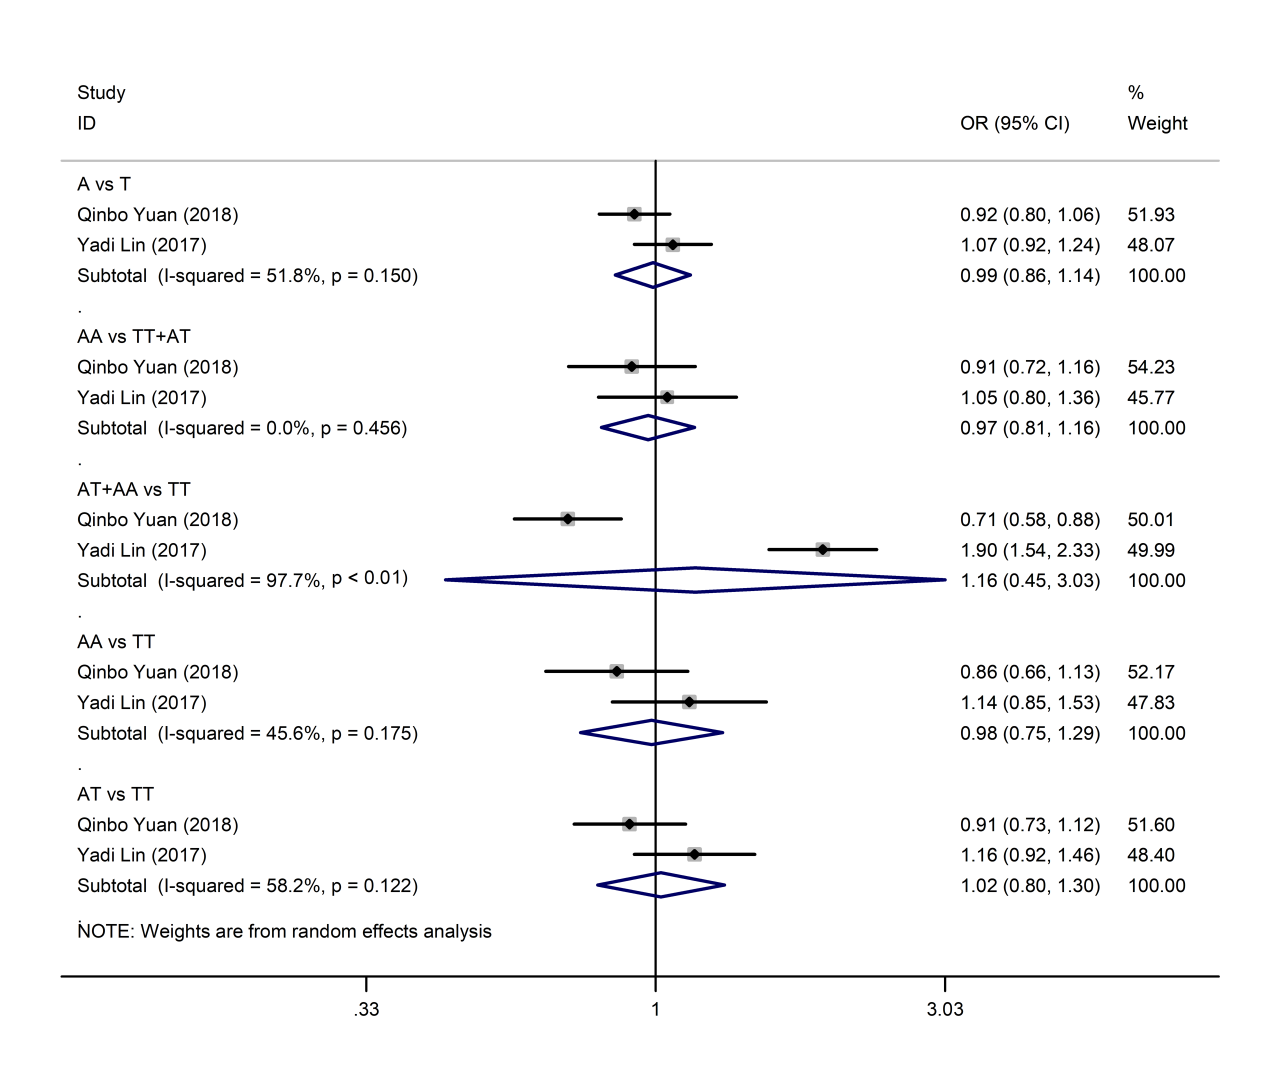


Supplementary figure 2. **The forest plot of the association between PCAT1 rs4871771 and cancer risk in five genetic models.** OR: odds ratios, 95% CI: 95% confidence intervals. Weights are from random effects analysis.
